# Supplementary material for: Prevalence of hypertension and possible risk factors of hypertension unawareness among individuals aged 30–75 years from two Panamanian provinces: Results from population-based cross-sectional studies, 2010 and 2019
Source: PubMed Central journal article supplement (PMC9704556; doi:10.1371/journal.pone.0276222), 2022-11-28
Supplement: pone.0276222.s001.pdf [file pone.0276222.s001.pdf]

**S1 Table.**  
**Definition of exposure variables based on the study year.**

| Exposure variables                               | Studies                    | Study questionnaire                                                                                                                                                                                                                                                                                                                                                                                                                                                                                                                                                                                                                                            | Assessment                                                                                                    | Missing value<br>N (%)                                                                                                                                        | Observations                                                                                                                                                                                                             |
|--------------------------------------------------|----------------------------|----------------------------------------------------------------------------------------------------------------------------------------------------------------------------------------------------------------------------------------------------------------------------------------------------------------------------------------------------------------------------------------------------------------------------------------------------------------------------------------------------------------------------------------------------------------------------------------------------------------------------------------------------------------|---------------------------------------------------------------------------------------------------------------|---------------------------------------------------------------------------------------------------------------------------------------------------------------|--------------------------------------------------------------------------------------------------------------------------------------------------------------------------------------------------------------------------|
| <b>Demographic and socioeconomic variables</b>   |                            |                                                                                                                                                                                                                                                                                                                                                                                                                                                                                                                                                                                                                                                                |                                                                                                               |                                                                                                                                                               |                                                                                                                                                                                                                          |
| Age                                              | PREFREC 2010<br>ENSPA 2019 | <i>How old are you now?</i><br>Fill the blank.<br><i>Age?</i><br>Fill the blank.                                                                                                                                                                                                                                                                                                                                                                                                                                                                                                                                                                               | Continuous and categorical variable ("<50 years" or "≥50 years")                                              | -<br>-                                                                                                                                                        | -                                                                                                                                                                                                                        |
| Sex                                              | PREFREC 2010<br>ENSPA 2019 | <i>Sex?</i><br>Options: "men" or "women".<br><i>Sex of interviewee.</i><br>Options: "men" or "women".                                                                                                                                                                                                                                                                                                                                                                                                                                                                                                                                                          | Dichotomic variable "men" or "women"                                                                          | -<br>-                                                                                                                                                        | Based on the phenotypic characteristic.                                                                                                                                                                                  |
| Ethnicity                                        | PREFREC 2010<br>ENSPA 2019 | <i>To which socio-cultural milieu do you belong?</i><br>Options: "Afro-Panamanian", "Mestizo", "Asian", "Indigenous", "Caucasian", or "others"                                                                                                                                                                                                                                                                                                                                                                                                                                                                                                                 | Categorical variable "Afro-Panamanian", "Caucasian", "Mestizo", "Indigenous", or "others (including Asians)". | -<br>-                                                                                                                                                        | Asians were grouped with "others" due to small numbers.                                                                                                                                                                  |
| Region                                           | PREFREC 2010<br>ENSPA 2019 | Based on INEC definitions [1] using the last Panamanian Census 2010.<br>Options: "urban", "rural", or "indigenous".                                                                                                                                                                                                                                                                                                                                                                                                                                                                                                                                            | Dichotomic variable "urban" "non-urban"                                                                       | -<br>-                                                                                                                                                        | Indigenous and rural regions were grouped into "non-urban" due to small numbers.                                                                                                                                         |
| Education                                        | PREFREC 2010<br>ENSPA 2019 | <i>How many years of education?</i><br>Options: "never attended", "primary education (one to six years)", "secondary education (seven to twelve years)", "technical (thirteen years)", "university (fourteen to eighteen years)", or "post-graduate (nineteen years)".<br><i>What is the highest level of education you've achieved?</i><br>Options: "no formal education", "special education", "incomplete primary education", "complete primary education", "incomplete secondary education", "complete secondary education", "technical", "non-university higher education", "completed university", "incomplete university", "post-graduate", or "other". | Categorical variable "no/primary education" "secondary education" "higher education"                          | men: 3611 (1.4)<br>women: 5064 (1.0)<br><br>men: 7975 (1.2)<br>women: 6001 (0.9)<br>("others" was set to missing)                                             | Special education (ENSPA) was grouped with "no/primary education" and technical education was grouped with "secondary education".<br><br>University and post-graduate were grouped into "higher education".              |
| Monthly Family Income                            | PREFREC 2010<br>ENSPA 2019 | <i>What is the monthly family income?</i><br>Options: "<250 PAB", "250–300 PAB", "301–600 PAB", "601–999 PAB", "1000–1200 PAB", ">1200 PAB", or "Don't know".<br><i>Could you give me an estimate of the monthly family income?</i><br>Options: "Doesn't have", "1–74 PAB", "75–99 PAB", "100–124 PAB", "125–149 PAB", "150–174 PAB", "175–199 PAB", "200–249 PAB", "250–299 PAB", "300–399 PAB", "400–499 PAB", "500–599 PAB", "600–699 PAB", "700–799 PAB", "800–899 PAB", "900–999 PAB", "1000–1499 PAB", "1500–1999 PAB", ">2000 PAB", or "Don't know".                                                                                                    | Categorical variable "less than 250 PAB" "250–999 PAB" "≥ 1000 PAB".                                          | men: 4291 (1.7)<br>women: 32268 (6.1)<br>("don't know" was set to missing)<br><br>men: 30969 (4.6)<br>women: 34992 (5.2)<br>("don't know" was set to missing) | Although the PAB is the official currency of Panama, the United States dollar (USD) is also a <i>de facto</i> currency. The exchange rate between PAB and USD is set at parity, according to Panamanian law 84/1904. [2] |
| <b>Established risk factors for hypertension</b> |                            |                                                                                                                                                                                                                                                                                                                                                                                                                                                                                                                                                                                                                                                                |                                                                                                               |                                                                                                                                                               |                                                                                                                                                                                                                          |
|                                                  | PREFREC 2010               | <i>Have you ever smoked a tobacco product in your life?</i><br>Options: "yes", or "no".                                                                                                                                                                                                                                                                                                                                                                                                                                                                                                                                                                        | Categorical variable                                                                                          | men: 921 (0.4)                                                                                                                                                | We did not consider assessing both the consumption of electronic nicotine                                                                                                                                                |

|                                                   |              |                                                                                                                                                                                                                                                                                                                                                                                                                                                 |                                                                                                                                                                                                             |                                                                             |                                                                                                                                                                                                                                                                           |
|---------------------------------------------------|--------------|-------------------------------------------------------------------------------------------------------------------------------------------------------------------------------------------------------------------------------------------------------------------------------------------------------------------------------------------------------------------------------------------------------------------------------------------------|-------------------------------------------------------------------------------------------------------------------------------------------------------------------------------------------------------------|-----------------------------------------------------------------------------|---------------------------------------------------------------------------------------------------------------------------------------------------------------------------------------------------------------------------------------------------------------------------|
| Tobacco consumption                               | ENSPA 2019   | <p><i>Have you used cigarettes or other smoked tobacco products in the previous 30 days?</i><br/>Options: "yes" or "no".</p> <p><i>At any time in your life, how often do you use smoked tobacco?</i><br/>Options: "daily", "not daily", or "never".</p> <p><i>How often did you use smoked tobacco in the previous 30 days?</i><br/>Options: "daily", "not daily", or "never".</p>                                                             | <p>"current smoker"<br/>(Smoked 30 days before answering the survey)</p> <p>"ex-smoker"<br/>(Smoked more than 30 days prior to replying to the survey)</p> <p>"non-smokers"</p>                             | <p>women: 480 (0.1)</p> <p>men: 1 (0.0)</p> <p>women: 156 (0.0)</p>         | <p>delivery systems and non-smoke tobacco products because they were not asked in the PREFREC survey. Furthermore, results from the Global Adult Tobacco Survey in 2013 showed that the prevalence of non-smoked tobacco products consumption in Panama was 0.8%. [3]</p> |
| Physical inactivity                               | PREFREC 2010 | Indicator: used the amount of time in minutes per week participants reported doing certain physical activities.                                                                                                                                                                                                                                                                                                                                 | Dichotomic variable<br>"physical inactivity"<br>(less than 150 minutes of certain physical activity per week or less than 600 MET-minutes per week)                                                         | -                                                                           | Physical inactivity was defined as not meeting current WHO recommendations on physical activity for health. [4]                                                                                                                                                           |
|                                                   | ENSPA 2019   | Indicator: used the Global Physical Activity Questionnaire [4] to classify individuals based on their METs.                                                                                                                                                                                                                                                                                                                                     |                                                                                                                                                                                                             | men: 135212 (20.3)<br>women: 124222 (18.3)                                  |                                                                                                                                                                                                                                                                           |
| Body Mass Index                                   | PREFREC 2010 | Weight: Two measurements were taken using a calibrated instrument. If the 1 <sup>st</sup> and 2 <sup>nd</sup> measurement had a difference of >0.5 kg, a third measurement was performed.<br>Height: Two measurements were taken. If the 1 <sup>st</sup> and 2 <sup>nd</sup> measurement had a difference of >0.5 cm, a third measurement was performed.<br>The average of the measurements was considered the participant's weight and height. | Categorical variable<br>"underweight" (<18.5 kg/m <sup>2</sup> )<br>"normal weight" (18.5 to 24.9 kg/m <sup>2</sup> )<br>"overweight" (25 to 29.9 kg/m <sup>2</sup> )<br>"obesity" (≥30 kg/m <sup>2</sup> ) | Men: 1940 (0.8)<br>Women: 10251 (1.9)                                       | Calculated by dividing the participant's weight in kilograms by the square of their height in meters squared.                                                                                                                                                             |
|                                                   | ENSPA 2010   |                                                                                                                                                                                                                                                                                                                                                                                                                                                 |                                                                                                                                                                                                             | Men: 87786 (13.2)<br>Women: 76261 (11.3)                                    | Classification was based on WHO criteria. [5]                                                                                                                                                                                                                             |
| Family history of hypertension                    | PREFREC 2010 | <i>Have any of your family members (parents, grandparents, aunts, uncles, siblings) been diagnosed with hypertension?</i><br>Options: "yes", "no", or "don't know".<br><i>Have any of your family members (parents, grandparents, aunts, uncles, siblings) been diagnosed with hypertension?</i>                                                                                                                                                | Dichotomic variable<br>"yes" or "no"                                                                                                                                                                        | Men: 16480 (6.5)<br>Women: 16919 (3.2)<br>("Don't know" was set to missing) | -                                                                                                                                                                                                                                                                         |
|                                                   | ENSPA 2019   | Options: "yes" or "no".                                                                                                                                                                                                                                                                                                                                                                                                                         |                                                                                                                                                                                                             | -                                                                           |                                                                                                                                                                                                                                                                           |
| Self-reported medical history of diabetes         | PREFREC 2010 | <i>Have you been told by a physician that you have diabetes?</i><br>Options: "yes" or "no".                                                                                                                                                                                                                                                                                                                                                     | Dichotomic variable<br>"yes" or "no"                                                                                                                                                                        | -                                                                           | -                                                                                                                                                                                                                                                                         |
|                                                   | ENSPA 2019   | <i>Has a physician diagnosed you with type 1 diabetes? or has a physician diagnosed you with type 2 diabetes?</i><br>Options: "yes" or "no".                                                                                                                                                                                                                                                                                                    |                                                                                                                                                                                                             | -                                                                           |                                                                                                                                                                                                                                                                           |
| BP assessment in the year before study enrollment | PREFREC 2010 | <i>When was the last time a health professional checked your blood pressure?</i><br>Options: "in the previous year", "1-5 years", "more than 5 years", or "never".                                                                                                                                                                                                                                                                              | Dichotomic variable<br>"yes" or "no"                                                                                                                                                                        | -                                                                           | -                                                                                                                                                                                                                                                                         |
|                                                   | ENSPA 2019   | <i>Have you had your blood pressure checked in the previous year?</i><br>Options: "yes" or "no".<br>Additional question: <i>How many health check-ups do you have each year?</i><br>Options: "none", "1-2", or ">3".                                                                                                                                                                                                                            |                                                                                                                                                                                                             | -                                                                           |                                                                                                                                                                                                                                                                           |

N=weighted study population. INEC= Spanish language for "National Institute of Statistics and Census". PAB=Panamanian Balboa. METs= Metabolic Equivalents.

**Reference:**

1. National Institute of Statistics and Census. Glossary of terms [cited 28 June 2021]. Available from: [https://www.inec.gob.pa/glosario/Default.aspx?ORDEN=L&ID\\_IDIOMA=1](https://www.inec.gob.pa/glosario/Default.aspx?ORDEN=L&ID_IDIOMA=1)
2. Torres JE. Population, economy, and society in Panama: a contribution to the critique of Panamanian historiography. Editorial Universitaria "Carlos Manuel Gasteazoro"; 1999; p. 307.
3. Global Adult Tobacco Survey. Panama 2013. Fact sheet [cited 9 July 2021]. Available from: [https://www.who.int/tobacco/surveillance/survey/gats/pan\\_factsheet2013.pdf](https://www.who.int/tobacco/surveillance/survey/gats/pan_factsheet2013.pdf)
4. World Health Organization. Global Physical Activity Surveillance [cited 9 July 2021]. Available from: [https://www.who.int/ncds/surveillance/steps/GPAQ\\_EN.pdf](https://www.who.int/ncds/surveillance/steps/GPAQ_EN.pdf)
5. Harvard T.H. Chan website. Obesity Prevention Source: Why Use BMI? [cited 27 July 2021]. Available from: <https://www.hsph.harvard.edu/obesity-prevention-source/obesity-definition/obesity-definition-full-story/>
