# Supplementary material for: Prevalence of hypertension and possible risk factors of hypertension unawareness among individuals aged 30–75 years from two Panamanian provinces: Results from population-based cross-sectional studies, 2010 and 2019
Source: PubMed Central journal article supplement (PMC9704556; doi:10.1371/journal.pone.0276222), 2022-11-28
Supplement: pone.0276222.s004.pdf [file pone.0276222.s004.pdf]

**S4 Table.**

**Crude and adjusted logistic regression analysis of hypertension unawareness (SBP/DBP  $\geq$ 140/90 mmHg without a self-reported medical history of hypertension) in hypertensive participants aged between 30 and 75 years in the PREFREC study in the provinces of Panama and Colon. Odds ratio (OR) and 95% confidence intervals (CIs).**

| Demographic Factors                                       | Crude analysis<br>OR (95% CI) | Adjusted analysis<br>OR (95% CI) |                           |                           |                           |
|-----------------------------------------------------------|-------------------------------|----------------------------------|---------------------------|---------------------------|---------------------------|
|                                                           |                               | Model 1                          | Model 2                   | Model 3                   | Model 4                   |
| <b>Sex</b>                                                |                               |                                  |                           |                           |                           |
| Women (reference)                                         |                               |                                  |                           |                           |                           |
| Men                                                       | <b>2.49 (1.60 – 3.89)</b>     | <b>2.30 (1.33 – 3.96)</b>        | <b>2.32 (1.30 – 4.13)</b> | <b>2.31 (1.29 – 4.13)</b> | <b>2.31 (1.29 – 4.12)</b> |
| <b>Age group</b>                                          |                               |                                  |                           |                           |                           |
| $\geq$ 50 years (reference)                               |                               |                                  |                           |                           |                           |
| <50 years                                                 | <b>1.69 (1.07 – 2.65)</b>     | <b>1.68 (1.01 – 2.80)</b>        | 1.61 (0.95 – 2.73)        | 1.61 (0.95 – 2.72)        | <b>1.84 (1.06 – 3.17)</b> |
| <b>Ethnicity</b>                                          |                               |                                  |                           |                           |                           |
| Caucasian (reference)                                     |                               |                                  |                           |                           |                           |
| Afro-Panamanian                                           | 1.34 (0.65 – 2.79)            | 1.07 (0.47 – 2.43)               | 1.05 (0.46 – 2.41)        | 1.05 (0.46 – 2.41)        | 1.17 (0.51 – 2.72)        |
| Mestizo                                                   | 0.96 (0.52 – 1.80)            | 0.94 (0.47 – 1.87)               | 0.96 (0.47 – 1.97)        | 0.96 (0.47 – 1.96)        | 1.04 (0.50 – 2.16)        |
| Indigenous                                                | 0.91 (0.23 – 3.55)            | 1.26 (0.30 – 5.22)               | 1.22 (0.29 – 5.15)        | 1.20 (0.29 – 5.04)        | 1.47 (0.37 – 5.92)        |
| Others (including Asians)                                 | 2.40 (0.59 – 9.77)            | 0.95 (0.23 – 3.88)               | 0.58 (0.12 – 2.93)        | 0.59 (0.12 – 2.96)        | 0.74 (0.14 – 3.98)        |
| <b>Risk factors for hypertension</b>                      |                               |                                  |                           |                           |                           |
| <b>Tabaco consumption</b>                                 |                               |                                  |                           |                           |                           |
| Non-smoker (reference)                                    |                               |                                  |                           |                           |                           |
| Ex-smoker                                                 | 1.28 (0.78 – 2.10)            | 0.90 (0.50 – 1.62)               | 0.81 (0.44 – 1.48)        | 0.81 (0.44 – 1.48)        | 0.81 (0.45 – 1.47)        |
| Current smoker                                            | 1.64 (0.66 – 4.10)            | 0.56 (0.16 – 1.95)               | 0.56 (0.16 – 1.98)        | 0.56 (0.16 – 1.99)        | 0.56 (0.16 – 1.97)        |
| <b>Body mass index<sup>1</sup></b>                        |                               |                                  |                           |                           |                           |
| Healthy weight (reference)                                |                               |                                  |                           |                           |                           |
| Underweight                                               | 3.38 (0.88 – 12.98)           | 2.62 (0.52 – 13.11)              | 2.40 (0.48 – 11.89)       | 2.36 (0.47 – 11.81)       | 2.36 (0.46 – 12.01)       |
| Overweight                                                | 0.70 (0.41 – 1.18)            | 0.64 (0.37 – 1.09)               | 0.60 (0.35 – 1.04)        | 0.60 (0.35 – 1.04)        | 0.63 (0.36 – 1.10)        |
| Obesity                                                   | <b>0.45 (0.25 – 0.80)</b>     | <b>0.45 (0.24 – 0.84)</b>        | <b>0.45 (0.24 – 0.84)</b> | <b>0.45 (0.24 – 0.85)</b> | <b>0.48 (0.25 – 0.91)</b> |
| <b>Physical inactivity</b>                                |                               |                                  |                           |                           |                           |
| No (reference)                                            |                               |                                  |                           |                           |                           |
| Yes                                                       | <b>0.54 (0.29 – 0.99)</b>     | <b>0.47 (0.25 – 0.88)</b>        | <b>0.47 (0.24 – 0.89)</b> | <b>0.47 (0.25 – 0.89)</b> | <b>0.43 (0.22 – 0.84)</b> |
| <b>Family history of hypertension</b>                     |                               |                                  |                           |                           |                           |
| No (reference)                                            |                               |                                  |                           |                           |                           |
| Yes                                                       | <b>0.51 (0.31 – 0.83)</b>     | 0.60 (0.35 – 1.00)               | <b>0.57 (0.34 – 0.98)</b> | <b>0.58 (0.34 – 0.99)</b> | 0.62 (0.36 – 1.06)        |
| <b>Self-reported medical history of diabetes</b>          |                               |                                  |                           |                           |                           |
| No (reference)                                            |                               |                                  |                           |                           |                           |
| Yes                                                       | 0.85 (0.45 – 1.60)            | 1.00 (0.51 – 2.00)               | 1.06 (0.53 – 2.10)        | 1.05 (0.53 – 2.10)        | 1.09 (0.54 – 2.19)        |
| <b>BP measurement in the year before study enrollment</b> |                               |                                  |                           |                           |                           |
| No (reference)                                            |                               |                                  |                           |                           |                           |
| Yes                                                       | <b>0.31 (0.18 – 0.54)</b>     | <b>0.48 (0.27 – 0.86)</b>        | <b>0.51 (0.28 – 0.95)</b> | <b>0.52 (0.28 – 0.96)</b> | <b>0.46 (0.25 – 0.87)</b> |
| <b>Socioeconomic Factors</b>                              |                               |                                  |                           |                           |                           |
| <b>Monthly Family Income</b>                              |                               |                                  |                           |                           |                           |
| $\geq$ 1 000 PAB (reference)                              |                               |                                  |                           |                           |                           |
| 250 – 999 PAB                                             | 0.90 (0.45 – 1.78)            |                                  | 0.83 (0.40 – 1.74)        | 0.83 (0.40 – 1.74)        | 0.69 (0.33 – 1.48)        |
| <250 PAB                                                  | 0.32 (0.42 – 1.70)            |                                  | 0.90 (0.42 – 1.92)        | 0.88 (0.40 – 1.94)        | 0.62 (0.26 – 1.50)        |
| <b>Regions</b>                                            |                               |                                  |                           |                           |                           |
| Urban (reference)                                         |                               |                                  |                           |                           |                           |
| Non-urban                                                 | <b>1.41 (0.99 – 2.01)</b>     |                                  |                           | 1.07 (0.70 – 1.62)        | 0.94 (0.60 – 1.47)        |
| <b>Education</b>                                          |                               |                                  |                           |                           |                           |
| Higher education (reference)                              |                               |                                  |                           |                           |                           |
| Secondary                                                 | 0.79 (0.43 – 1.46)            |                                  |                           |                           | 1.39 (0.74 – 2.64)        |
| No/primary education                                      | 1.19 (0.65 – 2.18)            |                                  |                           |                           | <b>2.27 (1.06 – 4.86)</b> |

SBP=systolic blood pressure. DBP=diastolic blood pressure. OR=odds ratio. CI=confidence interval. BP=blood pressure.

BMI=body mass index. PAB=Panamanian Balboa.

Model 1= adjusted by sex, age group, ethnicity, BMI, physical inactivity, family history of hypertension, self-reported medical history of diabetes, tobacco consumption, and BP measurement in the year before study enrollment.

Model 2= further adjusted by monthly family income.

Model 3= further adjusted by region.

Model 4= further adjusted by education.

<sup>1</sup>According to World Health Organization (WHO).
