# Supplementary material for: Prevalence of hypertension and possible risk factors of hypertension unawareness among individuals aged 30–75 years from two Panamanian provinces: Results from population-based cross-sectional studies, 2010 and 2019
Source: PubMed Central journal article supplement (PMC9704556; doi:10.1371/journal.pone.0276222), 2022-11-28
Supplement: pone.0276222.s005.pdf [file pone.0276222.s005.pdf]

**S5 Table.**

**Crude and adjusted logistic regression analysis of hypertension unawareness (SBP/DBP  $\geq$ 140/90 mmHg without a self-reported medical history of hypertension) in hypertensive participants aged between 30 and 75 years in the ENSPA study in the provinces of Panama and Colon. Odds ratio (OR) and 95% confidence intervals (CIs).**

| Demographic Factors                                       | Crude analysis<br>OR (95% CI) | Adjusted analysis<br>OR (95% CI) |                           |                           |                           |
|-----------------------------------------------------------|-------------------------------|----------------------------------|---------------------------|---------------------------|---------------------------|
|                                                           |                               | Model 1                          | Model 2                   | Model 3                   | Model 4                   |
| <b>Sex</b>                                                |                               |                                  |                           |                           |                           |
| Female (reference)                                        |                               |                                  |                           |                           |                           |
| Male                                                      | <b>2.19 (1.62 – 2.97)</b>     | <b>2.13 (1.42 – 3.20)</b>        | <b>2.15 (1.44 – 3.22)</b> | <b>2.13 (1.42 – 3.20)</b> | <b>2.09 (1.37 – 3.17)</b> |
| <b>Age</b>                                                |                               |                                  |                           |                           |                           |
| $\geq$ 50 years (reference)                               |                               |                                  |                           |                           |                           |
| <50 years                                                 | <b>2.22 (1.60 – 3.09)</b>     | <b>2.29 (1.54 – 3.40)</b>        | <b>2.29 (1.50 – 3.51)</b> | <b>2.24 (1.46 – 3.42)</b> | <b>2.43 (1.57 – 3.76)</b> |
| <b>Ethnicity</b>                                          |                               |                                  |                           |                           |                           |
| Caucasian (reference)                                     |                               |                                  |                           |                           |                           |
| Afro-Panamanian                                           | 1.27 (0.77 – 2.07)            | 1.66 (0.85 – 3.24)               | 1.58 (0.81 – 3.10)        | 1.59 (0.80 – 3.16)        | 1.60 (0.80 – 3.21)        |
| Mestizo                                                   | 0.89 (0.57 – 1.38)            | 1.24 (0.70 – 2.18)               | 1.20 (0.68 – 2.11)        | 1.18 (0.66 – 2.10)        | 1.18 (0.66 – 2.09)        |
| Indigenous                                                | 2.35 (0.94 – 5.85)            | 1.62 (0.61 – 4.30)               | 1.52 (0.57 – 4.03)        | 1.32 (0.48 – 3.64)        | 1.32 (0.47 – 3.71)        |
| Others (including Asians)                                 | 2.13 (0.81 – 5.64)            | 1.82 (0.64 – 5.16)               | 1.58 (0.56 – 4.47)        | 1.62 (0.58 – 4.56)        | 1.37 (0.47 – 3.99)        |
| <b>Risk factors for hypertension</b>                      |                               |                                  |                           |                           |                           |
| <b>Tabaco consumption</b>                                 |                               |                                  |                           |                           |                           |
| Non-smoker (reference)                                    |                               |                                  |                           |                           |                           |
| Ex-smoker                                                 | 0.89 (0.37 – 2.12)            | 1.34 (0.38 – 4.72)               | 1.25 (0.34 – 4.63)        | 1.19 (0.33 – 4.25)        | 1.24 (0.33 – 4.68)        |
| Current smoker                                            | 1.53 (0.68 – 3.42)            | 0.94 (0.34 – 2.58)               | 0.80 (0.30 – 2.16)        | 0.81 (0.30 – 2.24)        | 0.73 (0.27 – 1.98)        |
| <b>Body mass index<sup>1</sup></b>                        |                               |                                  |                           |                           |                           |
| Healthy weight (reference)                                |                               |                                  |                           |                           |                           |
| Underweight                                               | 0.69 (0.11 – 4.49)            | 0.89 (0.24 – 3.35)               | 0.79 (0.21 – 2.93)        | 0.83 (0.22 – 3.08)        | 0.88 (0.24 – 3.32)        |
| Overweight                                                | 0.96 (0.60 – 1.54)            | 1.09 (0.65 – 1.85)               | 1.18 (0.70 – 1.99)        | 1.18 (0.70 – 1.97)        | 1.16 (0.68 – 1.98)        |
| Obesity                                                   | <b>0.60 (0.39 – 0.94)</b>     | 0.79 (0.47 – 1.34)               | 0.80 (0.48 – 1.34)        | 0.80 (0.48 – 1.34)        | 0.76 (0.44 – 1.29)        |
| <b>Physical inactivity</b>                                |                               |                                  |                           |                           |                           |
| No (reference)                                            |                               |                                  |                           |                           |                           |
| Yes                                                       | 0.95 (0.68 – 1.33)            | 0.92 (0.61 – 1.39)               | 0.90 (0.59 – 1.36)        | 0.91 (0.60 – 1.39)        | 0.88 (0.57 – 1.36)        |
| <b>Family history of hypertension</b>                     |                               |                                  |                           |                           |                           |
| No (reference)                                            |                               |                                  |                           |                           |                           |
| Yes                                                       | <b>0.17 (0.12 – 0.24)</b>     | <b>0.18 (0.12 – 0.27)</b>        | <b>0.18 (0.12 – 0.27)</b> | <b>0.18 (0.12 – 0.27)</b> | <b>0.18 (0.11 – 0.27)</b> |
| <b>Self-reported medical history of diabetes</b>          |                               |                                  |                           |                           |                           |
| No (reference)                                            |                               |                                  |                           |                           |                           |
| Yes                                                       | <b>0.31 (0.18 – 0.54)</b>     | 0.57 (0.32 – 1.02)               | <b>0.54 (0.30 – 0.95)</b> | <b>0.55 (0.31 – 0.97)</b> | 0.55 (0.31 – 1.00)        |
| <b>BP measurement in the year before study enrollment</b> |                               |                                  |                           |                           |                           |
| No (reference)                                            |                               |                                  |                           |                           |                           |
| Yes                                                       | <b>0.25 (0.18 – 0.36)</b>     | <b>0.35 (0.23 – 0.52)</b>        | <b>0.35 (0.23 – 0.53)</b> | <b>0.34 (0.23 – 0.52)</b> | <b>0.35 (0.23 – 0.53)</b> |
| <b>Socioeconomic Factors</b>                              |                               |                                  |                           |                           |                           |
| <b>Monthly Family Income</b>                              |                               |                                  |                           |                           |                           |
| $\geq$ 1 000 PAB (reference)                              |                               |                                  |                           |                           |                           |
| 250 – 999 PAB                                             | <b>1.68 (1.08 – 2.65)</b>     |                                  |                           |                           | 1.39 (0.68 – 2.81)        |
| <250 PAB                                                  | <b>1.69 (1.03 – 2.75)</b>     |                                  |                           |                           | 1.00 (0.47 – 2.10)        |
| <b>Regions</b>                                            |                               |                                  |                           |                           |                           |
| Urban (reference)                                         |                               |                                  |                           |                           |                           |
| Non-urban                                                 | <b>1.78 (1.27 – 2.50)</b>     |                                  |                           | 1.48 (0.95 – 2.31)        | <b>1.63 (1.03 – 2.60)</b> |
| <b>Education</b>                                          |                               |                                  |                           |                           |                           |
| Higher education (reference)                              |                               |                                  |                           |                           |                           |
| Secondary                                                 | 1.49 (0.94 – 2.37)            |                                  | 1.58 (0.86 – 2.92)        | 1.54 (0.84 – 2.84)        | 1.42 (0.72 – 2.81)        |
| No/primary education                                      | 1.13 (0.69 – 1.85)            |                                  | 1.07 (0.56 – 2.05)        | 0.98 (0.51 – 1.87)        | 0.95 (0.45 – 1.99)        |

SBP=systolic blood pressure. DBP=diastolic blood pressure. OR=odds ratio. CI=confidence interval. BP=blood pressure.

BMI=body mass index. PAB=Panamanian Balboa.

Model 1= adjusted by sex, age group, ethnicity, BMI, physical inactivity, family history of hypertension, self-reported medical history of diabetes, tobacco consumption, and BP measurement in the year before study enrollment.

Model 2= further adjusted by education.

Model 3= further adjusted by region.

Model 4= further adjusted by monthly family income.

<sup>1</sup>According to World Health Organization (WHO).
